# Supplementary material
Source: ML conference proceedings conference paper supplement (https://openreview.net/forum?id=JYjVCFgHYI)

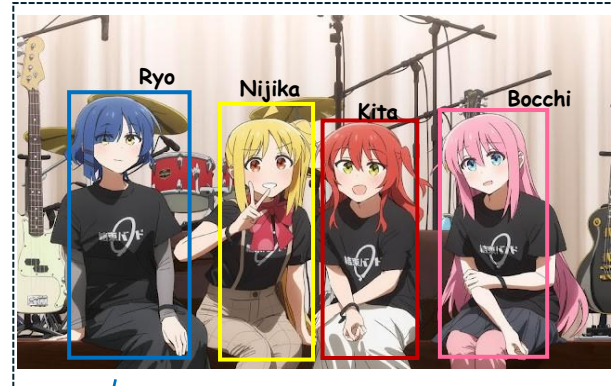

Input  
image+question

Input  
image+question

Input  
image+question

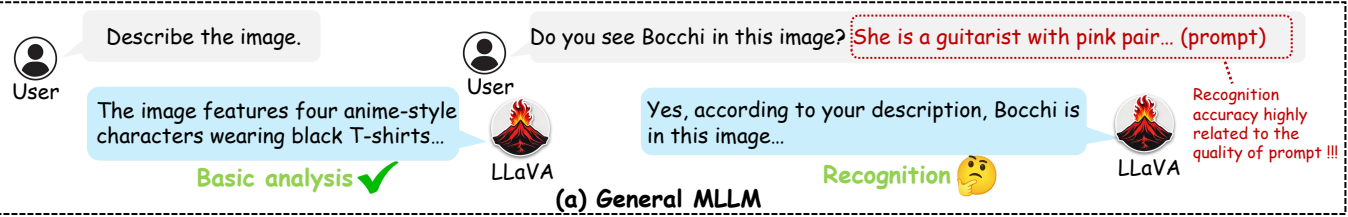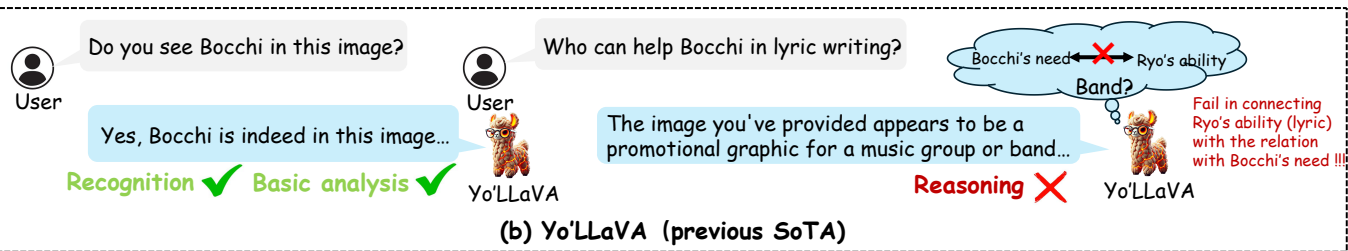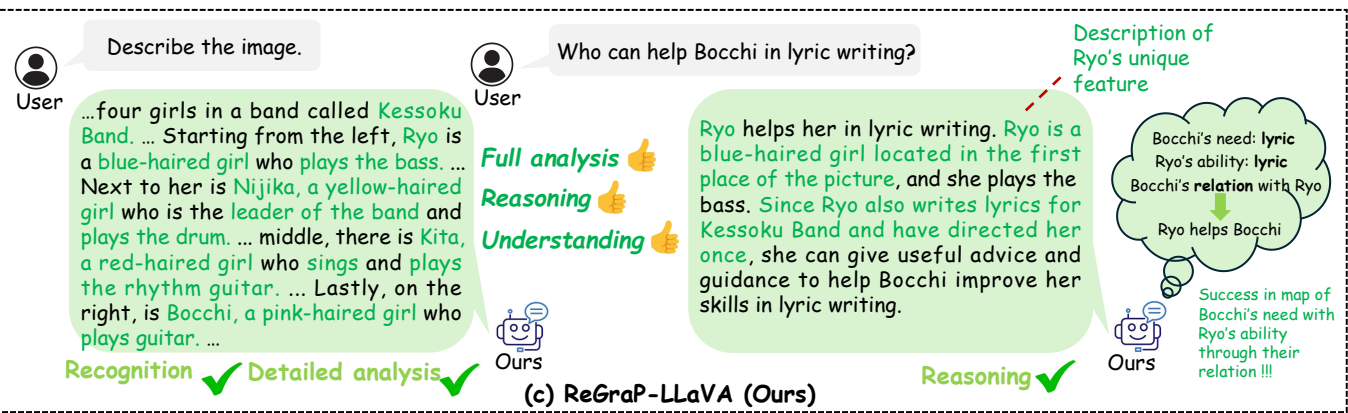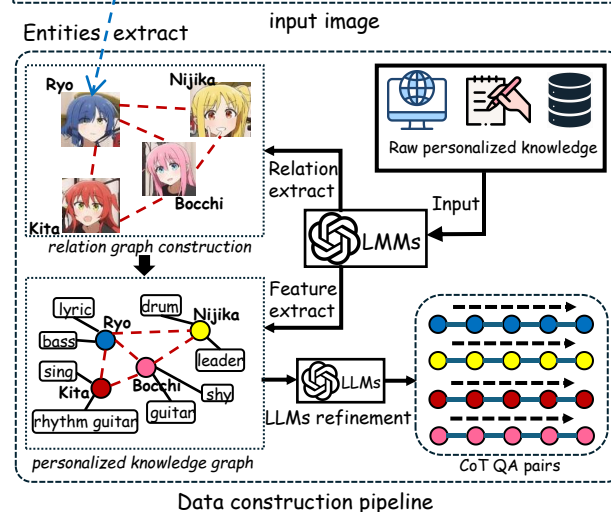

Supplement: supplementary_material [file motivation.pdf › Supplementary Material/assets/motivation.pdf]
